# Supplementary material for: Role of Bioelectricity During Cell Proliferation in Different Cell Types
Source: Front Bioeng Biotechnol. 2020 Jul 2;8:603. doi: 10.3389/fbioe.2020.00603 (PMC7343900; doi:10.3389/fbioe.2020.00603)
Supplement: Supplementary Table 2 — Raw data of Vmem and cell number for calculating Spearman correlation coefficient (Figure 3). [file Table_2.xlsx]

## Sheet: BMMSC
			Vmem BMMSC							Cell number					Well2_3	Well3_1	Well3_2	Well3_3		Mean	SD
Vmem BMSC	Day 0	Day 3	Day 5	Day 7	Day 10	Day 14		Proliferation	Day 0	Day 3	Day 5	Day 7	Day 10	Day 14
WELL 1 1	249420	3.15823e+06	1.55313e+06	873402	2.00077e+06	486204		1	-22857.8	1.42604e+06	1.51195e+06	1.14964e+06	3.9689e+06	4990342
2	846550	1.18361e+06	522544	733492	1.2751e+06	463642		2	-16520	1.26337e+06	1.48554e+06	633104	3.77877e+06	1.91123e+06
3	1.17152e+06	1.20926e+06	598010	1.00522e+06	956173	327944		3	213753	1.4873e+06	1.04717e+06	465153	3.84426e+06	3.31399e+06
4	715363	2.05403e+06	898124	1.36889e+06	3.06458e+06	322503		4	-22857.8	1.26865e+06	1.63236e+06	1.17604e+06	3912916	3.14499e+06
5	565060	1.27032e+06	758422	1.51091e+06	664437	446317		5	-24970.4	1.41019e+06	1.58272e+06	923587	4.0534e+06	2.93584e+06
6	1.15118e+06	1.34157e+06	679176	1.14755e+06	1.51829e+06	434789		6	186290	1.39963e+06	1.34188e+06	853871	3.73546e+06	3.08583e+06
7	534023	947194	669221	969743	1.56482e+06	384261		7	356354	883099	2.02848e+06	2.23974e+06	3.73757e+06	4.26783e+06
8	1.10525e+06	1.95559e+06	795753	1.43347e+06	2.88773e+06	222221		8	-33420.8	1.14084e+06	1.513e+06	2.34642e+06	3.73123e+06	4.02171e+06
9	1.33935e+06	467379	852113	701309	1.23827e+06	187803		9	216922	1.03309e+06	1.70525e+06	2.14044e+06	3.72912e+06	4081924
10	318213	1.13903e+06	756940	1.6415e+06	1.8166e+06	56244.8		Mean	94743.6	1.25691e+06	1.53871e+06	1.32533e+06	3.8324e+06	3.52819e+06
11	889789	1.10159e+06	844089	1.40833e+06	1.34192e+06	332232		SD	148622	202802	265252	724490	120555	907538
12	604429	538998	528753	816715	1.16793e+06	132447
13	771410	1.00306e+06	473687	1.5193e+06	1.07044e+06	148287
14	969052	1.21625e+06	2.37588e+06	1.35907e+06	1.18044e+06	106240		Vmem BMMSC	Cellnumber BMMSC
15	1.58023e+06	2.15592e+06	799016	921024	1.84702e+06	159006		601400	94743.6
16	270115	2449647	2.26103e+06	1.77203e+06	860730	319393		982883	1.25691e+06
17	773931	1.15242e+06	1.73191e+06	1.132e+06	375998	159405		1.41251e+06	1.53871e+06
18	1.46379e+06	831989	1121542	759601	1.04038e+06	322241		1.28073e+06	1.32533e+06
19	734858	1.09961e+06	1.23882e+06	1.12981e+06	1.91451e+06	333645		1.81816e+06	3.8324e+06
20	437008	1.01162e+06	2.50313e+06	917137	1.92104e+06	369639		335154	3.52819e+06
21	505152	870551	1.80053e+06	1.91046e+06	1.9347e+06	204164
22	1.54947e+06	1.42716e+06	1.97289e+06	1.94821e+06	874260	159454
23	398491	1.42346e+06	1.64844e+06	1.6307e+06	733843	249342
24	443917	1.33951e+06	844396	2.07602e+06	785087	404461		RANG-KORRELATION: SPEARMAN'S RHO 27.04.2020 (01:31)
25	751507	876406	1.53718e+06	1.24845e+06	1.52498e+06	291422		_______________________________________________________________________________
26	468405	1.00955e+06	1.84839e+06	1.26085e+06	2862602	344870
27	1.06798e+06	1.02641e+06	855219	818844	1.16296e+06	243788
28	429863	1.34452e+06	2.95649e+06	1.7659e+06	603907	147862		Eingabedatei ist "Clipboard"
29	656505	805777	934347	1.09066e+06	996976	205188
30	389113	1118177	393790	1.09235e+06	622659	237696
31	275292	781984	937856	2.49437e+06	787301	407512		Korreliere: Y = Variable 1 = VmemBMMS
32	231701	1.08879e+06	1.07796e+06	1.24622e+06	1.37789e+06	319198		mit: X = Variable 2 = Cellnumb01
33	473719	1.95289e+06	2.23912e+06	1.77572e+06	1.38596e+06	237744
34	252403	798582	613162	1358840	1.81293e+06	313700		Stichprobenumfang n = 6
35	1.12888e+06	1.29511e+06	544007	2.04655e+06	1.32763e+06	448213
36	453489	707894	1.91209e+06	1.62731e+06	1.64685e+06	342173
37	139529	1.00467e+06	2.55296e+06	1.39337e+06	2.16158e+06	221365		Spearman's Korrelationskoeffizient rho = 0.428571
38	240391	777929	2094200	1.94374e+06	1.73088e+06	161672
Well 2 39	1.04923e+06	570915	1.83381e+06	2.14596e+06	731953	266409		Effektstärke - Bewertung des Korrelationskoeffizienten rho nach Evans (1996):
40	336257	1.10915e+06	970720	1.68868e+06	1.61503e+06	494124		<0.2:Poor - 0.2-0.4:weak - 0.4-0.6:moderate - 0.6-0.8:strong - >0.8:optimal
41	934175	803391	1.10131e+06	2.54907e+06	1.87656e+06	364778
42	350732	504658	1.0338e+06	1.74428e+06	1.29149e+06	339550
43	474160	731300	1.05092e+06	668322	2.02929e+06	293530		Zweiseitiger Test (tabellenorientiert, n<=30): p > 0.200000
44	515265	590315	1.17244e+06	2.04199e+06	717368	326165		Zweiseitiger Test mit Edgeworth-Approximation: p = 0.416307
45	476771	703963	2.6143e+06	1.45709e+06	1.12027e+06	385613		Zweiseitiger exakter Test (Best-Roberts,n<=8): p = 0.419444
46	880771	1.82771e+06	672787	911939	1.71815e+06	282513		Exaktes Valz-Thompson-Verfahren: Optional per Eingabedialog
47	299777	470124	433409	1.51193e+06	807813	311183
48	638255	799011	545963	448093	1.24927e+06	288169		>> Empfohlen: Optimal Valz-Thompson, sonst Best-Roberts oder Edgeworth-Approx.
49	483451	998797	646894	835142	924233	280272
50	876714	1.19119e+06	884918	1.06798e+06	920126	363670
51	759280	930879	1.5303e+06	685979	1.21572e+06	564313		Zweiseitige approximative Tests (für n>30, wegen n=6 nicht adäquat!):
52	498275	669021	1.06914e+06	771289	1.66788e+06	319798
53	980940	695657	475388	816748	847148	431284		Zweiseitiger Test mit Student-t-Approximation: p = 0.396501
54	465913	498074	1.03936e+06	781036	634260	347897		Zweiseitiger Test mit Gauß-Approximation: p = 0.337904
55	708446	1.53243e+06	2.49368e+06	1.92219e+06	1.12207e+06	240780
56	817322	1.47996e+06	838332	504507	1.37306e+06	395062		Approximative Konfidenzintervalle für rho (testbasiert für n>30):
57	555766	931636	1.19268e+06	562664	2.8603e+06	427100
58	991094	622870	2.25183e+06	481173	2.41748e+06	327725		P=0.90: [-0.5345 , 1.0000 ] ::: P=0.95: [-0.8257 , 1.0000 ]
59	712597	506893	1.40145e+06	827756	2.56576e+06	442052		P=0.98: [-1.0000 , 1.0000 ] ::: P=0.99: [-1.0000 , 1.0000 ]
60	829314	496601	1.14188e+06	847811	3.60396e+06	273794
61	479954	1920667	1.81857e+06	1.08094e+06	2.65278e+06	374339
62	334498	377797	1.47251e+06	997547	2.61785e+06	720887		Literatur:
63	473085	1.6527e+06	968158	714116	1885555	487108		L. Sachs (2003) Angewandte Statistik. 11. Auflage Springer-Verlag, Kapitel 5.
64	273787	465324	1.46446e+06	1.76321e+06	2.19751e+06	548873		C. Spearman (1904) The proof and measurement of association between two
65	701894	377897	1.79623e+06	1.08587e+06	1.36984e+06	528088		things. Amer. J. Psychol. 15, pp. 72-101
66	808165	278974	1.5024e+06	1.00467e+06	1.67183e+06	288112		J.D. Evans (1996) Straightforward Statistics for the Behavioral Sciences.
67	962190	286773	1.39296e+06	690919	2.02529e+06	579469		Brooks/Cole Publishing, Pacific Grove, Calif. (Bewertung von rho: p.146)
68	568761	985242	1.64822e+06	869198	1.90066e+06	69310.8		DJ. Best, DE. Roberts (1975) The Upper Tail Probabilities of Spearman's Rho.
69	577978	1.31077e+06	979855	639666	2000179	310615		J. Roy. Stat. Soc. Ser. C, Applied Statistics Vol. 24, No. 3, pp. 377-379
70	855778	1.55398e+06	1.08596e+06	711377	1.99818e+06	281868
71	570413	266812	1.8736e+06	656947	1.91738e+06	241018
72	379259	2.12634e+06	1.87615e+06	849537	2.12156e+06	592429
73	381148	461318	1.15995e+06	1.07482e+06	1.82318e+06	169363
74	810282	453316	1.00978e+06	994169	1.5958e+06	259140
75	667733	525446	4.14189e+06	642163	2.52871e+06	123549
76	869469	662514	779747	858244	884490	402363
Well 3 77	403205	930080	1.16447e+06	3.74383e+06	1.302e+06	401181
78	781051	340877	1.53151e+06	3405952	3.97705e+06	640551
79	393721	384967	1.03826e+06	1.38476e+06	3.33876e+06	354439
80	233287	376436	989407	1.98526e+06	2.11467e+06	558930
81	1.47118e+06	383573	508798	970841	2.59446e+06	297495
82	126650	786238	520944	2.52551e+06	2.32775e+06	288874
83	445168	459575	1.0155e+06	783631	3.66252e+06	486066
84	447701	988814	670338	1.87547e+06	1.48708e+06	240816
85	438230	1.16873e+06	772493	1132057	2.88359e+06	283227
86	360211	4.03767e+06	910834	825832	1.60337e+06	539523
87	283063	832833	709104	1.96586e+06	1.88047e+06	451577
88	128424	361398	996847	940500	2.13848e+06	394546
89	58721.4	233209	1.02382e+06	1.8441e+06	2.97956e+06	270595
90	698580	305707	1.55211e+06	1.44599e+06	2370251	128910
91	355937	1.09005e+06	2.06774e+06	1.35608e+06	884490	532465
92	987566	1.76781e+06	3.38981e+06	774521	1.302e+06	700605
93	1.1451e+06	1.47611e+06	1.42237e+06	567744	3.97705e+06	1.10686e+06
94	307822	536819	2.44644e+06	1.14994e+06	3.33876e+06	241924
95	327808	560846	858968	755185	2.11467e+06	210873
96	517535	561321	1.03983e+06	1.30343e+06	2.59446e+06	354355
97	264104	1.45869e+06	1.11961e+06	598712	2.32775e+06	318821
98	128725	634862	1.19496e+06	576137	3.66252e+06	267489
99	467886	1.717e+06	966580	427767	1.48708e+06	301587
100	1.03395e+06	765961	1.21437e+06	679330	2.88359e+06	550448
101	741458	1.47532e+06	1.05968e+06	937275	1.60337e+06	213903
102	281613	764874	1.38076e+06	1.30886e+06	1.88047e+06	280920
103	426782	487746	1.56489e+06	1.38863e+06	2.13848e+06	460490
104	766269	998439	4.16466e+06	1.0374e+06	2.97956e+06	286437
105	464312	400886	2.20534e+06	1.21147e+06	2370251	148226
106	327647	1.52448e+06	853657	1.30682e+06	1.39639e+06	373623
107	145071	769945	1.88352e+06	2.18552e+06	1.63112e+06	167903
108	230948	418202	1289102	1.08585e+06	2.56263e+06	274510
109	543555	271995	1.73215e+06	1.90617e+06	2.53349e+06	378320
110	663235	265658	3.10773e+06	1.74992e+06	2.43531e+06	208570
111	398526	183357	2.65547e+06	1.46863e+06	1.88556e+06	263841
112	442627	193453	2.55646e+06	1.7465e+06	2.08061e+06	202643
113	300164	1.68016e+06	4.43312e+06	2.18733e+06	2.17057e+06	282368
114	326495	1.14749e+06	2.92448e+06	1.71073e+06	1.82972e+06	347094
Mean	375363	717194	2.38174e+06	1.70527e+06	2.05838e+06	277653
SD	158284	593478	1.08018e+06	371745	408974	76512.3

## Sheet: FIBROBLAST
				Vmem						Cell number
FIBRO	Day 0	Day 3	Day 5	Day 7	Day 10	Day 14		Cell number Fibroblast	Day 0	Day 3	Day 5	Day 7	Day 10	Day 14
1	694607	1.00788e+06	910389	1.60383e+06	1152056	650329		1	350616	356803	367918	328736	393121	257247
2	147087	123322	628804	1.18827e+06	368933	1.04473e+06		2	361958	331713	354514	553172	454987	126984
3	47975.4	125045	782111	881938	227907	819517		3	523841	324495	329080	322550	264921	68555.2
4	516686	178283	1.10429e+06	428786	544457	904719		4	368145	483972	288523	270651	258047	399538
5	141495	401696	395174	786591	804927	680027		5	470567	339961	324955	277525	229520	180258
6	418391	219828	754495	1.29966e+06	1.31352e+06	723470		6	364020	340992	355545	277525	468392	180258
7	605389	211113	862140	1.54242e+06	434352	923290		7	325870	339618	367574	169259	225052	137639
8	628618	265589	715179	213745	610887	758438		8	329994	346492	529801	198474	296198	159979
9	147295	482910	1.43506e+06	298331	85532.4	613235		9	305591	313496	275806	187819	148063	269276
10	586636	225026	1.70057e+06	327132	672893	443322
11	304622	446885	175068	258551	1.09382e+06	595651		Mean	377845	353060	354857	287301	304256	197748
12	509355	385583	458774	365542	250569	472379		SD	71940.1	50658	73438.7	115020	110431	97932
13	1.52307e+06	364756	242372	286526	600950	887356
14	494596	1.11737e+06	400903	525003	257526	364220
15	62133	206150	486424	613648	168218	378190
16	136842	178941	884876	1.10579e+06	715719	438987
17	221246	378762	181975	627943	284167	861577
18	229800	541526	635184	988178	363272	753468
19	310712	504583	706617	547205	185750	1.076e+06		FIBROBLASTS	Mean Cell Number	Mean Vmem
20	64040.6	712115	711789	303659	788049	1.17221e+06		Day 0	377845	304488
21	557487	223019	1.02778e+06	312908	1.17981e+06	475144		Day 3	353060	367426
22	165925	368329	375333	192364	1.14581e+06	919358		Day 5	354857	738098
23	64763.3	319124	172569	363245	548442	466420		Day 7	287301	680579
24	109201	111948	758511	403622	635075	512474		Day 10	304256	699890
25	1.00553e+06	214908	705730	439093	804787	541832		Day 14	197748	610770
26	508983	255539	264931	671242	573013	757651
27	281920	330070	320334	1.08241e+06	526035	795989
28	209952	177206	1.75131e+06	764730	376357	918981
29	259162	306350	339662	818344	438677	439454
30	42376.3	83092.9	305363	413838	1310879	1.29876e+06		RANG-KORRELATION: SPEARMAN'S RHO 27.04.2020 (01:32)
31	725013	103334	1.56486e+06	343502	752979	446938		_______________________________________________________________________________
32	61359.2	339541	326070	685967	893854	58650.7
33	310647	406094	300686	3.10562e+06	324347	1.25754e+06
34	758928	351371	1.1632e+06	1.37349e+06	536760	631206		Eingabedatei ist "Clipboard"
35	936910	146468	1.39228e+06	1.36279e+06	638513	637578
36	136460	732550	285861	1.31477e+06	222309	591724
37	195831	403726	680122	1.6856e+06	623230	352747		Korreliere: Y = Variable 3 = VmemFibr
38	1.17822e+06	504575	787565	1.37385e+06	347260	276460		mit: X = Variable 4 = Cellnumb02
39	161922	126785	409843	1.63303e+06	630824	999188
40	243485	147939	358729	722442	456379	1.41787e+06		Stichprobenumfang n = 6
41	169046	406409	285525	1.0308e+06	291152	484675
42	187647	339309	414840	879851	407005	1.27138e+06
43	536767	204048	622151	586979	485075	1.56714e+06		Spearman's Korrelationskoeffizient rho = -0.200000
44	279416	138434	297410	544885	617228	487555
45	92428.9	492606	776996	548564	465317	1.21218e+06		Effektstärke - Bewertung des Korrelationskoeffizienten rho nach Evans (1996):
46	224615	559384	940650	564048	678196	437048		<0.2:Poor - 0.2-0.4:weak - 0.4-0.6:moderate - 0.6-0.8:strong - >0.8:optimal
47	223715	611034	351079	371166	376774	355012
48	156960	101586	306768	629134	867432	600433
49	135033	1.02853e+06	797255	305984	569676	531454		Zweiseitiger Test (tabellenorientiert, n<=30): p > 0.200000
50	153775	105085	465435	483229	253164	115927		Zweiseitiger Test mit Edgeworth-Approximation: p = 0.733189
51	462440	390681	695039	716758	933782	142738		Zweiseitiger exakter Test (Best-Roberts,n<=8): p = 0.713889
52	607299	346016	409828	603719	548448	533847		Exaktes Valz-Thompson-Verfahren: Optional per Eingabedialog
53	75624	267381	703782	487313	608332	290421
54	407632	1.19302e+06	1.40908e+06	323769	515763	177576		>> Empfohlen: Optimal Valz-Thompson, sonst Best-Roberts oder Edgeworth-Approx.
55	189782	175882	314868	2.38824e+06	677790	314973
56	826783	346263	469093	442526	511086	305633
57	66831.2	284293	773585	273827	615885	202242		Zweiseitige approximative Tests (für n>30, wegen n=6 nicht adäquat!):
58	281872	304169	625304	177674	579812	239459
59	256718	149667	152049	367617	620995	423199		Zweiseitiger Test mit Student-t-Approximation: p = 0.704000
60	135156	820052	703124	444204	977373	268401		Zweiseitiger Test mit Gauß-Approximation: p = 0.654721
61	663442	110005	699305	1.96296e+06	975968	507319
62	185113	109166	913679	1.37366e+06	178829	317412		Approximative Konfidenzintervalle für rho (testbasiert für n>30):
63	297749	544339	235802	1.45231e+06	332739	465865
64	185459	1.14086e+06	422782	688390	943867	425491		P=0.90: [-1.0000 , 0.8444 ] ::: P=0.95: [-1.0000 , 1.0000 ]
65	377166	174568	528400	245302	492810	571539		P=0.98: [-1.0000 , 1.0000 ] ::: P=0.99: [-1.0000 , 1.0000 ]
66	144446	127537	813633	183586	870748	346354
67	321788	397142	279924	621390	845913	198161
68	166493	183741	408121	1.36957e+06	786361	208371
69	182165	945003	977595	562458	1.07383e+06	872590
70	186172	341285	320453	1.49282e+06	472796	511083
71	276564	368599	498054	590791	762381	467236
72	382812	235980	356168	631499	825938	209222
73	662404	282315	593462	1121374	1.34041e+06	178050
74	298291	1.2602e+06	964884	323355	1.00363e+06	210169
75	286371	713752	655057	557668	532518	862380
76	363562	680924	275103	531501	903751	566125
77	51184.8	156337	1.30776e+06	233234	277264	587202
78	101966	164192	737569	1.61172e+06	1.2179e+06	328467
79	98937	89356.8	527139	266589	545140	232541
80	840990	142376	1.4772e+06	811669	456065	287290
81	219421	347195	1.10032e+06	828925	298494	438535
82	366130	302015	858826	271406	535571	266476
83	103663	833428	350815	614894	680631	598028
84	447310	332035	662695	681925	996362	230467
85	301983	254205	501386	579456	1.96544e+06	269348
86	468834	778360	209182	351284	240325	288629
87	213362	293913	370477	553027	567701	277053
88	135045	240726	564129	615109	1.45549e+06	371557
89	182118	278754	693963	403895	1054197	834917
90	356900	335674	1.19709e+06	288599	755462	1.43355e+06
91	572648	412142	1.36281e+06	791768	135031	1.42685e+06
92	141103	599738	721315	1.11625e+06	321621	817669
93	201684	225605	1.80506e+06	949967	741205	356248
94	190573	140649	1.74182e+06	1.12122e+06	493005	570764
95	570892	200517	467279	688089	208014	365101
96	307219	418600	788395	397475	1.12122e+06	624278
97	195255	387509	482607	502920	572906	213821
98	637196	667163	552232	495132	494759	600305
99	128231	380168	625069	494587	1.65354e+06	676131
100	536668	180085	361653	580451	726688	1.44405e+06
101	245768	1.0068e+06	961483	332706	1.1394e+06	596686
102	95042.7	283367	1.53214e+06	258574	343686	818468
103	290526	273574	482810	285748	1.58308e+06	622103
104	450599	266889	797100	456077	2.17186e+06	997087
105	493198	244097	447166	529158	784383	448485
106	288616	163849	515355	310203	793216	667255
107	98278	214398	655956	254372	933034	883408
108	63588	401155	703908	1.14265e+06	1121231	365656
109	175802	1.06286e+06	756774	1.02134e+06	531168	249713
110	805201	298295	298005	388210	532637	468141
111	69279.6	253037	384854	381390	318154	258733
112	219524	218194	554005	604006	1.01965e+06	1.50013e+06
113	188455	549497	981312	608066	563773	1.43293e+06
114	530058	254277	533416	592446	763107	901222
115	186376	430016	1.56356e+06	393256	554980	602032
116	178706	153980	1.07416e+06	155450	197055	427796
117	151036	172033	604464	344904	358642	210222
118	55969.9	287843	980083	320483	1.96088e+06	374302
119	80056	461771	764535	577812	575213	512725
120	162654	157108	304307	308349	337691	937683
121	52188.7	258479	810983	764562	1.37151e+06	987350
122	120311	460051	2.31028e+06	250069	423386	688277
123	133527	374418	967043	1515180	1.27026e+06	812622
124	384437	303261	742937	462766	582369	1.13685e+06
125	49455	144953	737470	404563	626602	889761
126	80955	525570	1.87215e+06	297766	670853	649057
127	128196	305626	2243030	162789	695182	463604
128	278978	210197	746341	1.15137e+06	1.2842e+06	510725
129	172901	460291	1.31244e+06	524680	647127	541247
130	235079	224501	990164	390240	691048	688614
131	730138	220244	485643	370215	469022	694898
132	102683	382535	912455	384013	589682	463119
133	97130.2	284612	1.27854e+06	465089	1.7571e+06	398635
134	138287	259961	1.04818e+06	552190	245373	842456
135	49351.8	265483	904163	533364	1.23295e+06	637017
Mean	304488	367426	738098	680579	699890	610770
SD	250232	251603	432960	472122	395788	335030

## Sheet: OSC 
				Vmem						Cell number
OSC	Day 0	Day 3	Day 5	Day 7	Day 10	Day 14		Cell number	Day 0	Day 3	Day 5	Day 7	Day 10	Day 14
1	13237	111222	18341.7	198729	287958	349594		1	354147	1.10019e+06	1.02276e+06	808422	233739	1.42043e+06
2	5188.4	97381	24264	167735	260800	160762		2	311436	1.04107e+06	634716	165421	192331	1.47122e+06
3	6680.6	17876	25544	145430	176250	291613		3	307009	1.0067e+06	563879	152920	286867	1.43866e+06
4	18462	43128	88085.4	137532	178931	181051		4	296331	1.06946e+06	483927	231049	277231	1.81472e+06
5	14767.4	93133	52952.2	42677.8	254622	369206		5	361959	1.53224e+06	707636	160993	272804	1.00166e+06
6	9280.8	80589	114719	169020	498334	329567		6	434880	1.03977e+06	593828	242768	473335	1.50481e+06
7	7953.4	107777	130808	137591	201810	555909		7	522124	606154	420121	256571	403279	1.472e+06
8	4520.2	36782	231802	140379	177946	400195		8	366647	665272	676905	177140	315254	1.54882e+06
9	3297.6	159232	77616.5	127197	177362	198392		9	346334	534015	557107	249019	313691	1.59362e+06
10	440.6	160887	35674.8	102574	298092	560396
11	735	76653	73821.2	57880	331791	361121		Mean	366763	954986	628986	271589	307615	1.47399e+06
12	6337	21296	42242.1	28062.2	291710	526150		SD	71561.9	309742	172800	205519	85164.2	213361
13	3345	9395	84220.6	49552	396317	385663
14	3480	111039	55703.1	103379	272890	229415
15	9042.6	122775	38475.2	88560	254168	137806
16	28611.2	49093	128328	80479	303336	452331		Vmem OSC	CellnumberOSC
17	48883.6	40585	130838	53263.6	283540	346467		366763	18419.6
18	20304	56689	217220	21002.9	253952	255578		954986	93178.9
19	19086.8	66591	213130	44790.2	131746	86808.7		628986	108002
20	40506.4	65800	159935	35768.7	206199	398206		271589	77710.7
21	84739	166712	49862	48019.8	150980	451097		307615	247838
22	32171.4	146801	118665	30406.7	437972	230670		1.47399e+06	333138
23	19520.6	301609	196948	96684.4	228368	419200
24	106148	59234	155810	70363.7	202730	469493
25	27310	254129	93997	62372.9	165467	402846		RANG-KORRELATION: SPEARMAN'S RHO 27.04.2020 (01:33)
26	30434	270948	145981	33770.6	338070	298223		_______________________________________________________________________________
27	8431.6	49184	156027	34923.4	149852	360649
28	85176.8	187464	68927	91753.9	286408	166616
29	20657.6	28055	198586	139639	203852	357766		Eingabedatei ist "Clipboard"
30	36521.4	40969	103351	85641.8	87701	282309
31	2705.4	175371	63066.4	15293.3	133931	401766
32	9924.6	33381	48736.5	45344.2	414141	227667		Korreliere: Y = Variable 5 = VmemOSC
33	1115.4	49742	11847.4	45493	247805	302132		mit: X = Variable 6 = Cellnumb03
34	2659.8	50479	76013.4	40622	213949	246018
35	4252.4	41056	60055.7	39203.4	250218	390876		Stichprobenumfang n = 6
36	4342.4	97507	83536.9	97126.5	429375	199698
37	16265.4	31329	58225.3	53237.4	173005	370905
38	13892.4	65142	95566.3	32217.4	111731	250816		Spearman's Korrelationskoeffizient rho = 0.485714
39	6626	63166	145556	92546.9	151226	225891
40	10763.6	113531	90856.7	131803	156458	233159		Effektstärke - Bewertung des Korrelationskoeffizienten rho nach Evans (1996):
41	9931.2	123861	163058	117627	196725	435015		<0.2:Poor - 0.2-0.4:weak - 0.4-0.6:moderate - 0.6-0.8:strong - >0.8:optimal
42	17288.4	150648	264174	25923.6	397644	437285
43	3319.2	102591	139301	8669.56	225970	307522
44	10379.8	25877	206268	1857.8	206202	518858		Zweiseitiger Test (tabellenorientiert, n<=30): p > 0.200000
45	144.2	36343	121945	124839	355156	428493		Zweiseitiger Test mit Edgeworth-Approximation: p = 0.348582
46		29930	284960	49067.6	287958	328035		Zweiseitiger exakter Test (Best-Roberts,n<=8): p = 0.355556
47		61014	191672	44337.3	260800	285745		Exaktes Valz-Thompson-Verfahren: Optional per Eingabedialog
48		52672	187863	40604.4	176250	306858
49		79797	201106	50124.6	178931	735845		>> Empfohlen: Optimal Valz-Thompson, sonst Best-Roberts oder Edgeworth-Approx.
50		112007	275300	148081	254622	285714
51		125178	189668	77855.3	498334	287158
52		110853	181241	93558.5	201810	308442		Zweiseitige approximative Tests (für n>30, wegen n=6 nicht adäquat!):
53		84384	289473	117329	177946	241779
54		48835	189740	68021.4	177362	391756		Zweiseitiger Test mit Student-t-Approximation: p = 0.328723
55		49350	31247.7	51474.4	298092	377066		Zweiseitiger Test mit Gauß-Approximation: p = 0.277439
56		52485	74192	128139	331791	290139
57		75580.5	36305.1	48329.2	291710	515112		Approximative Konfidenzintervalle für rho (testbasiert für n>30):
58		36956	70492.3	65812.9	396317	134051
59		62845	33060.1	116575	272890	185009		P=0.90: [-0.4460 , 1.0000 ] ::: P=0.95: [-0.7278 , 1.0000 ]
60		28281	119986	121807	254168	326727		P=0.98: [-1.0000 , 1.0000 ] ::: P=0.99: [-1.0000 , 1.0000 ]
61		394332	159724	137414	303336	343317
62		23714	85311	97003.8	283540	338617
63		30820	127867	131720	253952	316754		Literatur:
64		129113	60332	24816.2	131746	340426		L. Sachs (2003) Angewandte Statistik. 11. Auflage Springer-Verlag, Kapitel 5.
65		28131	126342	73448	206199	308160		C. Spearman (1904) The proof and measurement of association between two
66		31483	169264	43425.6	150980	445890		things. Amer. J. Psychol. 15, pp. 72-101
67		42544	245323	65109.4	437972	313916		J.D. Evans (1996) Straightforward Statistics for the Behavioral Sciences.
68		70226	189718	18156.6	228368	237960		Brooks/Cole Publishing, Pacific Grove, Calif. (Bewertung von rho: p.146)
69		52058	135806	37707.3	202730	369132		DJ. Best, DE. Roberts (1975) The Upper Tail Probabilities of Spearman's Rho.
70		31559	247306	44968.7	165467	509441		J. Roy. Stat. Soc. Ser. C, Applied Statistics Vol. 24, No. 3, pp. 377-379
71		78613	216487	15299.3	338070	570432
72		110425	283751	19962.6	149852	401607
73		67734	284770	105100	286408	662034
74		32998	87271	32244.3	203852	309658
75		22269	121164	22921	87701	360369
76		9758	56068.6	95529.8	133931	280178
77		79096	149874	96835.2	414141	201659
78		327000	205037	65449.5	247805	235715
79		32921	154272	55803.9	213949	107549
80		8243	16668.2	95359.6	250218	237796
81		44031	143456	87338.3	429375	182701
82		36627	103988	37152.4	173005	167506
83		241794	115049	36140	111731	88494.8
84		50795	62311	120194	151226	228758
85		164435	102527	127784	156458	619786
86		65877	111765	87500.1	196725	289688
87		28585	257003	108738	397644	175244
88		284165	88245.8	27868.6	225970	129334
89		27697	93023.9	29254.9	206202	263399
90		2824	110806	35257.4	355156	242463
91		30504	67948	156512	237820	479201
92		32947	100266	91347.5	138366	494804
93		136178	93684.3	106957	101548	457764
94		40624	56938.8	138544	54461.2	264766
95		44496	80929.6	43344	25297.9	333973
96		103504	80369.2	108156	18010.9	503731
97		59306	78811.1	101562	3408.16	71729.9
98		242037	40017.2	165195	59993.5	125763
99		101353	165177	231125	105364	185219
100		11630	154186	121919	88765.8	180941
101		44918	108426	92540.4	95369.2	523667
102		43192	72181.5	44990.6	87108.6	527843
103		21103	83323.7	76915.9	152716	711647
104		109019	159450	35168.2	60791.4	413831
105		120717	167861	43404.6	16533	461571
106		143199	147935	118324	91307.4	354866
107		88155	14676.9	143179	378637	376392
108		73587	89728.4	169569	112382	267520
109		138997	117813	91336.6	139824	286068
110		26597	81793.9	66790.7	96427.6	212384
111		76323	70217.4	100004	134795	161100
112		78201	83485.2	57201.8	270715	778230
113		14572	105706	136375	272529	476857
114		21152	83059.6	50407.1	288868	218368
115		11088	73514.1	111149	162245	133271
116		20831	76003	125713	174311	94847.2
117		27855	256198	81221.6	117491	431333
118		75152	70650.1	143138	206668	76825.5
119		33894	183304	166332	214232	314063
120		43313	68428.1	111558	107089	328764
121		53297	102800	19351.6	387999	270064
122		43043	190323	25301	312137	209198
123		41000	97402	84073.2	167952	245212
124		72279	182006	108738	160056	349404
125		30082	119853	114261	235051	220279
126		58611	187509	183436	149786	233627
127		48585	201884	114230	180210	279641
128		16713	135376	62344	128777	262790
129		52533	219506	75321.3	143058	275797
130		77842	69413	100554	51840.2	228553
131		60077	119768	42770.6	115351	183866
132		32984	161012	107171	110644	333576
133		56120	61377.1	118989	118181	396464
134		54813	103234	87520.3	102719	446605
135		94570	56049.8	109055	138242	263962
Mean	18419.6	93178.9	108002	77710.7	247838	333138
SD	23060.1	68281.5	63288.4	49041.8	95000.6	115203
