# Supplementary material for: Role of Bioelectricity During Cell Proliferation in Different Cell Types
Source: Front Bioeng Biotechnol. 2020 Jul 2;8:603. doi: 10.3389/fbioe.2020.00603 (PMC7343900; doi:10.3389/fbioe.2020.00603)
Supplement: Supplementary Table 3 — Raw data of AlamarBlue measurement in BMMSC, Fibroblasts, and OSC (Figure 4). [file Table_3.xlsx]

## Sheet: AlamarBlue BMMSC
							BMMSC
						AlmarBlue % Reduction
						Time Points	Control	Ouabain
						Day 0	2.63967	-0.249347
						Day 0	-2.02632	-0.397692
						Day 0	-3.30038	-1.5192
						Day 0	0.639666	-0.406105
						Day 0	-1.30458	-4.36298
						Day 0	-1.83588	-1.13204
						Day 0	0.0757475	0.983697
						Day 0	-0.540769	3.23411
						Day 0	-1.16992	3.25303
						Day 3	27.6232	2.71669
						Day 3	31.475	10.6664
						Day 3	25.7124	12.0901
						Day 3	17.8915	17.4149
						Day 3	18.2966	14.4855
						Day 3	23.4767	17.2242
						Day 3	53.0328	14.0768
						Day 3	50.4468	13.9577
						Day 3	55.3347	12.8085
						Day 5	44.9006	17.7031
						Day 5	35.1059	16.6071
						Day 5	42.7552	17.1384
						Day 5	49.3297	25.1772
						Day 5	58.2205	25.2494
						Day 5	57.8319	28.0433
						Day 5	81.1915	25.7234
						Day 5	73.2426	27.7657
						Day 5	81.6382	28.0142
						Day 7	55.0133	21.6815
						Day 7	57.3596	23.4064
						Day 7	55.5724	20.9623
						Day 7	52.2798	30.786
						Day 7	49.9779	31.8332
						Day 7	30.868	32.0861
						Day 7	60.1346	50.1834
						Day 7	74.9047	49.3882
						Day 7	63.4826	43.8609
						Day 10	89.222	31.0065
						Day 10	77.1029	25.9183
						Day 10	75.6108	23.7175
						Day 10	71.356	52.0647
						Day 10	79.4006	49.5167
						Day 10	74.1232	52.0369
						Day 10	81.7683	45.2886
						Day 10	75.2381	42.5559
						Day 10	86.2723	42.1275
						Day 14	50.1117	27.7357
						Day 14	60.8609	25.8683
						Day 14	63.3221	26.928
						Day 14	73.4918	56.1623
						Day 14	89.5599	50.1312
						Day 14	75.5599	51.4645
						Day 14	84.4118	50.9544
						Day 14	91.2768	52.866
						Day 14	81.622	54.8516	Stichprobenumfang n = 54
															Stichprobenumfang n = 54
									Shapiro-Wilk's Prüfgröße W = 0.8921 ( p : approximativ wie Z(W)!! )
									Royston's Prüfgröße Z(W) = 3.8936 ( p = 0.000049 approx. (n>= 7) )						Shapiro-Wilk's Prüfgröße W = 0.9259 ( p : approximativ wie Z(W)!! )
															Royston's Prüfgröße Z(W) = 2.7780 ( p = 0.002735 approx. (n>= 7) )
						Mult.Paarvergleich	Testgröße	df	p-unkorr.	p-Bonferroni
						Day0Cont...Day0Ouab	0.6641	88	0.508386	2.54193	Nonsignificant
						Day0Cont...Day3Cont	9.7396	88	0	0
						Day0Cont...Day3Ouab	3.3203	88	0.00131	0.00655
						Day0Cont...Day5Cont	15.9375	88	0	0
						Day0Cont...Day5Ouab	5.9766	88	0	0
						Day0Cont...Day7Cont	15.4948	88	0	0
						Day0Cont...Day7Ouab	8.8542	88	0	0
						Day0Cont...Day10Con	20.1433	88	0	0
						Day0Cont...Day10Oua	10.625	88	0	0
						Day0Cont...Day14Con	19.9219	88	0	0
						Day0Cont...Day14Oua	12.8386	88	0	0
						Day0Ouab...Day3Cont	9.0755	88	0	0
						Day0Ouab...Day3Ouab	2.6563	88	0.009381	0.046905
						Day0Ouab...Day5Cont	15.2735	88	0	0
						Day0Ouab...Day5Ouab	5.3125	88	1e-06	5e-06
						Day0Ouab...Day7Cont	14.8307	88	0	0
						Day0Ouab...Day7Ouab	8.1901	88	0	0
						Day0Ouab...Day10Con	19.4792	88	0	0
						Day0Ouab...Day10Oua	9.9609	88	0	0
						Day0Ouab...Day14Con	19.2578	88	0	0
						Day0Ouab...Day14Oua	12.1745	88	0	0
						Day3Cont...Day3Ouab	6.4193	88	0	0	Significant
						Day3Cont...Day5Cont	6.1979	88	0	0
						Day3Cont...Day5Ouab	3.763	88	0.000302	0.00151
						Day3Cont...Day7Cont	5.7552	88	0	0
						Day3Cont...Day7Ouab	0.8854	88	0.378344	1.89172
						Day3Cont...Day10Con	10.4037	88	0	0
						Day3Cont...Day10Oua	0.8854	88	0.378344	1.89172
						Day3Cont...Day14Con	10.1823	88	0	0
						Day3Cont...Day14Oua	3.099	88	0.002607	0.013035
						Day3Ouab...Day5Cont	12.6172	88	0	0
						Day3Ouab...Day5Ouab	2.6563	88	0.009381	0.046905
						Day3Ouab...Day7Cont	12.1745	88	0	0
						Day3Ouab...Day7Ouab	5.5339	88	0	0
						Day3Ouab...Day10Con	16.8229	88	0	0
						Day3Ouab...Day10Oua	7.3047	88	0	0
						Day3Ouab...Day14Con	16.6016	88	0	0
						Day3Ouab...Day14Oua	9.5182	88	0	0
						Day5Cont...Day5Ouab	9.9609	88	0	0	Significant
						Day5Cont...Day7Cont	0.4427	88	0.659063	3.29531
						Day5Cont...Day7Ouab	7.0833	88	0	0
						Day5Cont...Day10Con	4.2057	88	6.2e-05	0.00031
						Day5Cont...Day10Oua	5.3125	88	1e-06	5e-06
						Day5Cont...Day14Con	3.9844	88	0.000139	0.000695
						Day5Cont...Day14Oua	3.099	88	0.002607	0.013035
						Day5Ouab...Day7Cont	9.5182	88	0	0
						Day5Ouab...Day7Ouab	2.8776	88	0.005028	0.02514
						Day5Ouab...Day10Con	14.1667	88	0	0
						Day5Ouab...Day10Oua	4.6484	88	1.2e-05	6e-05
						Day5Ouab...Day14Con	13.9453	88	0	0
						Day5Ouab...Day14Oua	6.862	88	0	0
						Day7Cont...Day7Ouab	6.6406	88	0	0	Significant
						Day7Cont...Day10Con	4.6484	88	1.2e-05	6e-05
						Day7Cont...Day10Oua	4.8698	88	5e-06	2.5e-05
						Day7Cont...Day14Con	4.4271	88	2.7e-05	0.000135
						Day7Cont...Day14Oua	2.6563	88	0.009381	0.046905
						Day7Ouab...Day10Con	11.2891	88	0	0
						Day7Ouab...Day10Oua	1.7708	88	0.080051	0.400255
						Day7Ouab...Day14Con	11.0677	88	0	0
						Day7Ouab...Day14Oua	3.9844	88	0.000139	0.000695
						Day10Con...Day10Oua	9.5182	88	0	0	Significant
						Day10Con...Day14Con	0.2214	88	0.825329	4.12664
						Day10Con...Day14Oua	7.3047	88	0	0
						Day10Oua...Day14Con	9.2969	88	0	0
						Day10Oua...Day14Oua	2.2135	88	0.029446	0.14723
						Day14Con...Day14Oua	7.0833	88	0	0	Significant

## Sheet: AlamarBlue Fibroblast
		FIBROBLASTS
	AlmarBlue % Reduction
	Time Points	Control	Ouabain
	Day 0	7.24464	11.1321
	Day 0	11.2804	13.5592
	Day 0	11.1636	13.2783
	Day 0	12.4672	22.5882
	Day 0	12.84	18.0579
	Day 0	13.1984	22.038
	Day 0	11.1363	22.7071
	Day 0	12.4535	22.9343
	Day 0	9.72229	8.47136
	Day 3	12.6699	2.16064
	Day 3	17.3363	4.12535
	Day 3	18.6629	3.87468
	Day 3	15.4467	5.08211
	Day 3	15.5994	5.02562
	Day 3	15.1377	5.47663
	Day 3	16.9859	4.34953
	Day 3	16.7909	4.23214
	Day 3	17.3761	3.92235
	Day 5	3.46433	7.78858
	Day 5	3.71014	6.18593
	Day 5	4.8379	7.25553
	Day 5	15.2009	7.76654
	Day 5	15.5093	8.81589
	Day 5	13.282	8.31633
	Day 5	20.3851	11.1075
	Day 5	18.4891	11.1745
	Day 5	18.5886	13.5393
	Day 7	42.7544	13.8306
	Day 7	39.8668	12.7094
	Day 7	37.3743	12.8299
	Day 7	45.241	12.0297
	Day 7	45.7981	12.1285
	Day 7	42.7228	11.9329
	Day 7	35.2918	16.9297
	Day 7	41.8752	17.2547
	Day 7	38.3395	18.2149
	Day 10	96.017	7.64398
	Day 10	105.982	9.29405
	Day 10	111.501	8.54635
	Day 10	105.722	12.5953
	Day 10	110.848	13.8126
	Day 10	118.433	14.0596
	Day 10	163.016	17.6857
	Day 10	167.275	16.7767
	Day 10	152.012	5.68569
	Day 14	67.3443	15.8368
	Day 14	67.2535	14.703
	Day 14	66.8963	14.7018
	Day 14	106.218	17.4425
	Day 14	106.145	16.6611
	Day 14	107.683	13.6133
	Day 14	118.689	19.071
	Day 14	116.15	24.2299
	Day 14	108.759	16.5704
								Stichprobenumfang n = 54						Shapiro-Wilk's Prüfgröße W = 0.9573 ( p : approximativ wie Z(W)!! )
	Statistics:Friedmann Test													Royston's Prüfgröße Z(W) = 1.2798 ( p = 0.100313 approx. (n>= 7) )
	Mult.Paarvergleich	Testgröße	df	p-unkorr.	p-Bonferroni			Shapiro-Wilk's Prüfgröße W = 0.8090 ( p : approximativ wie Z(W)!! )
								Royston's Prüfgröße Z(W) = 5.7477 ( p = 0.000000 approx. (n>= 7) )
	Day0Cont...Day0Ouab	1.469	88	0.145392	0.72696	Nonsignificant
	Day0Cont...Day3Cont	2.326	88	0.02232	0.1116
	Day0Cont...Day3Ouab	3.4277	88	0.000928	0.00464
	Day0Cont...Day5Cont	0.6121	88	0.542054	2.71027
CONTROL	Day0Cont...Day5Ouab	0.1224	88	0.902846	4.51423
	Day0Cont...Day7Cont	5.8761	88	0	0
	Day0Cont...Day7Ouab	3.3053	88	0.001374	0.00687
	Day0Cont...Day10Con	7.3451	88	0	0
	Day0Cont...Day10Oua	0.8569	88	0.39381	1.96905
	Day0Cont...Day14Con	7.9572	88	0	0
	Day0Cont...Day14Oua	1.2242	88	0.224148	1.12074
	Day0Ouab...Day3Cont	0.8569	88	0.39381	1.96905
	Day0Ouab...Day3Ouab	4.8968	88	4e-06	2e-05
	Day0Ouab...Day5Cont	0.8569	88	0.39381	1.96905
	Day0Ouab...Day5Ouab	1.5914	88	0.115096	0.57548
	Day0Ouab...Day7Cont	4.4071	88	2.9e-05	0.000145
	Day0Ouab...Day7Ouab	1.8363	88	0.069692	0.34846
	Day0Ouab...Day10Con	5.8761	88	0	0
	Day0Ouab...Day10Oua	2.326	88	0.02232	0.1116
	Day0Ouab...Day14Con	6.4882	88	0	0
	Day0Ouab...Day14Oua	0.2448	88	0.807152	4.03576
	Day3Cont...Day3Ouab	5.7537	88	0	0	Significant
	Day3Cont...Day5Cont	1.7139	88	0.090074	0.45037
OUABAIN	Day3Cont...Day5Ouab	2.4484	88	0.016334	0.08167
	Day3Cont...Day7Cont	3.5501	88	0.000621	0.003105
	Day3Cont...Day7Ouab	0.9794	88	0.330091	1.65046
	Day3Cont...Day10Con	5.0192	88	3e-06	1.5e-05
	Day3Cont...Day10Oua	3.1829	88	0.002016	0.01008
	Day3Cont...Day14Con	5.6313	88	0	0
	Day3Cont...Day14Oua	1.1018	88	0.273566	1.36783
	Day3Ouab...Day5Cont	4.0398	88	0.000114	0.00057
	Day3Ouab...Day5Ouab	3.3053	88	0.001374	0.00687
	Day3Ouab...Day7Cont	9.3038	88	0	0
	Day3Ouab...Day7Ouab	6.733	88	0	0
	Day3Ouab...Day10Con	10.7729	88	0	0
	Day3Ouab...Day10Oua	2.5708	88	0.011827	0.059135
	Day3Ouab...Day14Con	11.385	88	0	0
	Day3Ouab...Day14Oua	4.6519	88	1.2e-05	6e-05
	Day5Cont...Day5Ouab	0.7345	88	0.464589	2.32294	Nonsignificant
	Day5Cont...Day7Cont	5.264	88	1e-06	5e-06
	Day5Cont...Day7Ouab	2.6932	88	0.008473	0.042365
	Day5Cont...Day10Con	6.733	88	0	0
	Day5Cont...Day10Oua	1.469	88	0.145392	0.72696
	Day5Cont...Day14Con	7.3451	88	0	0
	Day5Cont...Day14Oua	0.6121	88	0.542054	2.71027
	Day5Ouab...Day7Cont	5.9985	88	0	0
	Day5Ouab...Day7Ouab	3.4277	88	0.000928	0.00464
	Day5Ouab...Day10Con	7.4676	88	0	0
	Day5Ouab...Day10Oua	0.7345	88	0.464589	2.32294
	Day5Ouab...Day14Con	8.0796	88	0	0
	Day5Ouab...Day14Oua	1.3466	88	0.181565	0.907825
	Day7Cont...Day7Ouab	2.5708	88	0.011827	0.059135	Nonsignificant
	Day7Cont...Day10Con	1.469	88	0.145392	0.72696
	Day7Cont...Day10Oua	6.733	88	0	0
	Day7Cont...Day14Con	2.0811	88	0.040329	0.201645
	Day7Cont...Day14Oua	4.6519	88	1.2e-05	6e-05
	Day7Ouab...Day10Con	4.0398	88	0.000114	0.00057
	Day7Ouab...Day10Oua	4.1622	88	7.3e-05	0.000365
	Day7Ouab...Day14Con	4.6519	88	1.2e-05	6e-05
	Day7Ouab...Day14Oua	2.0811	88	0.040329	0.201645
	Day10Con...Day10Oua	8.2021	88	0	0	Significant
	Day10Con...Day14Con	0.6121	88	0.542054	2.71027
	Day10Con...Day14Oua	6.1209	88	0	0
	Day10Oua...Day14Con	8.8142	88	0	0
	Day10Oua...Day14Oua	2.0811	88	0.040329	0.201645
	Day14Con...Day14Oua	6.733	88	0	0	Significant

## Sheet: AlamarBlue OSC
		OSC
	AlmarBlue % Reduction
	Time Points	Control	Ouabain
	Day 0	12.5871	-0.540773
	Day 0	16.1242	-1.44661
	Day 0	17.7107	1.65703
	Day 0	10.5482	-0.0168338
	Day 0	10.1999	-0.513419
	Day 0	10.0326	-0.0136761
	Day 0	16.2778	0.254602
	Day 0	16.3094	0.138868
	Day 0	16.9838	-0.717519
	Day 3	43.2747	-3.88704
	Day 3	39.0505	-3.54723
	Day 3	39.3452	-1.24625
	Day 3	40.1175	-2.04679
	Day 3	34.5826	-4.77142
	Day 3	36.9578	-4.79614
	Day 3	46.5827	-4.60372
	Day 3	39.1069	-3.90646
	Day 3	41.2561	-6.35307
	Day 5	0.272246	1.02467
	Day 5	3.46962	1.80089
	Day 5	3.54186	3.88723
	Day 5	8.26082	2.32776
	Day 5	3.20441	2.51631
	Day 5	9.1551	2.58327
	Day 5	11.6106	4.09253
	Day 5	11.8229	3.22996
	Day 5	12.3111	4.83086
	Day 7	44.0219	-5.25464
	Day 7	49.5176	-4.6382
	Day 7	48.2264	-3.74118
	Day 7	62.3317	-5.18451
	Day 7	60.8933	-5.71995
	Day 7	56.1415	-5.14104
	Day 7	53.8713	-6.03707
	Day 7	52.9328	-3.28279
	Day 7	48.5396	-4.49594
	Day 10	54.3824	-6.8551
	Day 10	66.4826	-6.84397
	Day 10	63.3349	-6.82395
	Day 10	70.2478	-6.91629
	Day 10	78.7842	-7.28125
	Day 10	78.7897	-4.51963
	Day 10	81.6871	-5.9939
	Day 10	80.7803	-7.0832
	Day 10	81.8495	-6.19196
	Day 14	58.0281	-8.67745
	Day 14	53.4558	-8.6894
	Day 14	44.2885	-8.22823
	Day 14	44.2085	-8.28557
	Day 14	38.4988	-7.84829
	Day 14	48.5549	-7.77541
	Day 14	46.353	-8.43253
	Day 14	40.0985	-7.90922
	Day 14	40.0185	-5.42416
					Stichprobenumfang n = 54						Stichprobenumfang n = 54
					Shapiro-Wilk's Prüfgröße W = 0.9264 ( p : approximativ wie Z(W)!! )						Shapiro-Wilk's Prüfgröße W = 0.9151 ( p : approximativ wie Z(W)!! )
					Royston's Prüfgröße Z(W) = 2.7573 ( p = 0.002914 approx. (n>= 7) )						Royston's Prüfgröße Z(W) = 3.1733 ( p = 0.000754 approx. (n>= 7) )
	Mult.Paarvergleich	Testgröße	df	p-unkorr.	p-Bonferroni
	Day0Cont...Day0Ouab	10.272	88	0	0	Significant
	Day0Cont...Day3Cont	4.1849	88	6.7e-05	0.000335
	Day0Cont...Day3Ouab	15.5982	88	0	0
	Day0Cont...Day5Cont	4.1849	88	6.7e-05	0.000335
	Day0Cont...Day5Ouab	6.0871	88	0	0
	Day0Cont...Day7Cont	9.5111	88	0	0
	Day0Cont...Day7Ouab	17.1199	88	0	0
	Day0Cont...Day10Con	13.3155	88	0	0
	Day0Cont...Day10Oua	19.4026	88	0	0
	Day0Cont...Day14Con	7.2284	88	0	0
	Day0Cont...Day14Oua	23.207	88	0	0
	Day0Ouab...Day3Cont	14.4568	88	0	0
	Day0Ouab...Day3Ouab	5.3262	88	1e-06	5e-06
	Day0Ouab...Day5Cont	6.0871	88	0	0
	Day0Ouab...Day5Ouab	4.1849	88	6.7e-05	0.000335
	Day0Ouab...Day7Cont	19.783	88	0	0
	Day0Ouab...Day7Ouab	6.848	88	0	0
	Day0Ouab...Day10Con	23.5875	88	0	0
	Day0Ouab...Day10Oua	9.1306	88	0	0
	Day0Ouab...Day14Con	17.5004	88	0	0
	Day0Ouab...Day14Oua	12.9351	88	0	0
	Day3Cont...Day3Ouab	19.783	88	0	0	Significant
	Day3Cont...Day5Cont	8.3697	88	0	0
	Day3Cont...Day5Ouab	10.272	88	0	0
	Day3Cont...Day7Cont	5.3262	88	1e-06	5e-06
	Day3Cont...Day7Ouab	21.3048	88	0	0
	Day3Cont...Day10Con	9.1306	88	0	0
	Day3Cont...Day10Oua	23.5875	88	0	0
	Day3Cont...Day14Con	3.0435	88	0.003083	0.015415
	Day3Cont...Day14Oua	27.3919	88	0	0
	Day3Ouab...Day5Cont	11.4133	88	0	0
	Day3Ouab...Day5Ouab	9.5111	88	0	0
	Day3Ouab...Day7Cont	25.1092	88	0	0
	Day3Ouab...Day7Ouab	1.5218	88	0.131652	0.65826
	Day3Ouab...Day10Con	28.9137	88	0	0
	Day3Ouab...Day10Oua	3.8044	88	0.000262	0.00131
	Day3Ouab...Day14Con	22.8266	88	0	0
	Day3Ouab...Day14Oua	7.6089	88	0	0
	Day5Cont...Day5Ouab	1.9022	88	0.060414	0.30207	Nonsignificant
	Day5Cont...Day7Cont	13.6959	88	0	0
	Day5Cont...Day7Ouab	12.9351	88	0	0
	Day5Cont...Day10Con	17.5004	88	0	0
	Day5Cont...Day10Oua	15.2177	88	0	0
	Day5Cont...Day14Con	11.4133	88	0	0
	Day5Cont...Day14Oua	19.0221	88	0	0
	Day5Ouab...Day7Cont	15.5982	88	0	0
	Day5Ouab...Day7Ouab	11.0328	88	0	0
	Day5Ouab...Day10Con	19.4026	88	0	0
	Day5Ouab...Day10Oua	13.3155	88	0	0
	Day5Ouab...Day14Con	13.3155	88	0	0
	Day5Ouab...Day14Oua	17.1199	88	0	0
	Day7Cont...Day7Ouab	26.631	88	0	0	Significant
	Day7Cont...Day10Con	3.8044	88	0.000262	0.00131
	Day7Cont...Day10Oua	28.9137	88	0	0
	Day7Cont...Day14Con	2.2827	88	0.024861	0.124305
	Day7Cont...Day14Oua	32.7181	88	0	0
	Day7Ouab...Day10Con	30.4354	88	0	0
	Day7Ouab...Day10Oua	2.2827	88	0.024861	0.124305
	Day7Ouab...Day14Con	24.3483	88	0	0
	Day7Ouab...Day14Oua	6.0871	88	0	0
	Day10Con...Day10Oua	32.7181	88	0	0	Significant
	Day10Con...Day14Con	6.0871	88	0	0
	Day10Con...Day14Oua	36.5225	88	0	0
	Day10Oua...Day14Con	26.631	88	0	0
	Day10Oua...Day14Oua	3.8044	88	0.000262	0.00131
	Day14Con...Day14Oua	30.4354	88	0	0	Significant
