# Supplementary material for: Role of Bioelectricity During Cell Proliferation in Different Cell Types
Source: Front Bioeng Biotechnol. 2020 Jul 2;8:603. doi: 10.3389/fbioe.2020.00603 (PMC7343900; doi:10.3389/fbioe.2020.00603)
Supplement: Supplementary Table 5 — Raw data of picogreen and AlamarBlue measurement for blocking-unblocking experiments in BMMSC (Figure 5). [file Table_5.xlsx]

## Sheet: PicoGreen
																										Shapiro-Wilk's Prüfgröße W = 0.0000 ( p <= 0.01 "exakt" (n<=50) )
																										Royston's approximative Prüfgröße Z(W) wird nur für n>=7 berechnet!!
					Blocking					UnBlocking
			CellNumber	Day 0		CellNumber	Day 3		CellNumber	Day 5		CellNumber	Day 7
			Well1_1	1.41688e+06		Well1_1	1.22428e+06		Well1_1	3.54004e+06		Well1_1	4.48015e+06
			Well1_2	3.88228e+06		Well1_2	1.38801e+06		Well1_2	3923479		Well1_2	6891682
			Well1_3	2.55557e+06		Well1_3	853523		Well1_3	3.41434e+06		Well1_3	5930449
			Well2_1			Well2_1	1.08274e+06		Well2_1	2.77528e+06		Well2_1	6.05192e+06
			Well2_2	1.93658e+06		Well2_2	1.01936e+06		Well2_2	3.04252e+06		Well2_2	4.25938e+06
			Well2_3			Well2_3	970772		Well2_3	2.9876e+06		Well2_3	5.35371e+06
			Well3_1			Well3_1	1.2433e+06		Well3_1	2.83232e+06		Well3_1	3162943
			Well3_2	3.25273e+06		Well3_2	1.33836e+06		Well3_2	3.10273e+06		Well3_2	3.20308e+06													Shapiro-Wilk's Prüfgröße W = 0.0000 ( p <= 0.010000 "exakt" (n<=50) )
			Well3_3			Well3_3	1.1102e+06		Well3_3	3.11858e+06		Well3_3	2.8112e+06													Royston's Prüfgröße Z(W) = 6.1164 ( p = 0.000000 approx. (n>= 7) )
			FRIEDMANN TEST	Multiple	Conover-Vergleiche	(Bonferroni-Holm-korrigiert):
			Mult.	Paarvergleich	Testgröße	p-unkorr.	p-Bonferroni
			Day0.......Day3....	3.5	12	0.004382	0.026291	Significance
			Day0.......Day5....	1	12	0.337049	1	non/significance
			Day0.......Day7....	3.5	12	0.004382	0.026291	Significance
			Day3.......Day5....	4.5	12	0.000727	0.00436	Significance
			Day3.......Day7....	7	12	1.4e-05	8.6e-05	Significance
			Day5.......Day7....	2.5	12	0.027915	0.167493	nonsigficance
																										Shapiro-Wilk's Prüfgröße W = 0.0000 ( p <= 0.010000 "exakt" (n<=50) )
																										Royston's Prüfgröße Z(W) = 6.1164 ( p = 0.000000 approx. (n>= 7) )
																										Shapiro-Wilk's Prüfgröße W = 0.0000 ( p <= 0.010000 "exakt" (n<=50) )
																										Royston's Prüfgröße Z(W) = 6.1164 ( p = 0.000000 approx. (n>= 7) )

## Sheet: Alamar Blue
																									Shapiro-Wilk's Prüfgröße W = 0.8534 ( p <= 0.100000 "exakt" (n<=50) )
																									Royston's Prüfgröße Z(W) = 1.4028 ( p = 0.080337 approx. (n>= 7) )
					Blocking					UnBlocking
			CellNumber	Day 0		CellNumber	Day 3		CellNumber	Day 5		CellNumber	Day 7
			Well1_1	26.3115		Well1_1	31.5129		Well1_1	10.0212		Well1_1	110.981
			Well1_2	31.2805		Well1_2	29.3752		Well1_2	8.92515		Well1_2	110.423
			Well1_3	31.2794		Well1_3	31.061		Well1_3	7.30752		Well1_3	110.651
			Well2_1	37.5604		Well2_1	16.6867		Well2_1	19.9965		Well2_1	122.181
			Well2_2	37.856		Well2_2	16.5746		Well2_2	20.3516		Well2_2	123.669
			Well2_3	38.4567		Well2_3	16.6391		Well2_3	20.4908		Well2_3	128.071
			Well3_1	39.1017		Well3_1	40.2499		Well3_1	26.5543		Well3_1	108.025
			Well3_2	37.2532		Well3_2	41.2402		Well3_2	24.8952		Well3_2	108.803
			Well3_3	30.6229		Well3_3	42.0558		Well3_3	25.6327		Well3_3	108.07
			FRIEDMANN TEST	Multiple	Conover-Vergleiche	(Bonferroni-Holm-korrigiert):
																									Shapiro-Wilk's Prüfgröße W = 0.8480 ( p <= 0.100000 "exakt" (n<=50) )
			Mult.	Paarvergleich	Testgröße	p-unkorr.	p-Bonferroni	Singificance																	Royston's Prüfgröße Z(W) = 1.4747 ( p = 0.070147 approx. (n>= 7) )
							Corrected
			Day0.......Day3....	1.3856	24	0.178599	1	Nonsignificant
			Day0.......Day5....	3.8105	24	0.000849	0.005096	Significant
			Day0.......Day7....	4.5033	24	0.000147	0.000881	Significant
			Day3.......Day5....	2.4249	24	0.023208	0.13925	Nonsignificant
			Day3.......Day7....	5.889	24	4e-06	2.7e-05	Singificance
			Day5.......Day7....	8.3138	24	0	0	Significant
																									Shapiro-Wilk's Prüfgröße W = 0.8572 ( p <= 0.100000 "exakt" (n<=50) )
																									Royston's Prüfgröße Z(W) = 1.3516 ( p = 0.088256 approx. (n>= 7) )
																									Shapiro-Wilk's Prüfgröße W = 0.7860 ( p <= 0.050000 "exakt" (n<=50) )
																									Royston's Prüfgröße Z(W) = 2.1794 ( p = 0.014651 approx. (n>= 7) )
